# Supplementary material for: Overactive Performance Monitoring as an Endophenotype for Obsessive-Compulsive Disorder: Evidence From a Treatment Study
Source: Atypon-hosted journal article supplement (doi:10.1176/appi.ajp.2014.14070886), 2015-03-18
Supplement: appi.ajp.2014.14070886.ds001.pdf [file appi.ajp.2014.14070886.ds001.pdf]

**DATA SUPPLEMENT**

**A. Sample Characteristics and Comparison Between Study Completer and Noncompleter**

Sixty OCD patients (women, N=31) and 60 healthy comparison participants (women, N=32) participated in the first testing session of the current study. Of these Forty-five patients (women, N=22) and 39 healthy comparison subjects (women, N=21) completed both testing sessions (T1 and T2). In the complete sample (including study completer and noncompleter) 26 patients had one to three comorbid diagnoses as follows: affective disorders (major depression, N=15; dysthymia, N=2), anxiety disorders (social phobia, N=10; panic disorder, N=3; generalized anxiety disorder, N=2; specific phobia, N=2), eating disorders (bulimia, N=1), somatoform disorders (hypochondria, N=1), tic disorder (N=2) and personality disorders (obsessive-compulsive, N=8; avoidant, N=3). Twenty-eight patients were medicated (selective serotonin reuptake inhibitors, N=22, tricyclic antidepressants N=6). Figure A displays subject flow and reasons for drop out. The overall dropout rate was 34.2%. 30% of all participants did not complete the second testing session for various reasons. The remaining 4.2% had to be excluded from data analysis due to poor quality recordings or insufficient number of error-trials during one of the two testing sessions (see Figure A). Importantly Completer and Non-Completer did not differ with regard to clinical characteristics (OCD patients and healthy comparison subjects: BDI-II:  $t=0.49$ ,  $df=118$ ,  $p=0.62$ , OCI-R:  $t=0.59$ ,  $df=118$ ,  $p=0.55$ , patients only: Y-BOCS:  $t=0.87$ ,  $df=58$ ,  $p=0.39$ , MADRS:  $t=1.32$ ,  $df=58$ ,  $p=0.19$ ) as well as gender ( $\chi^2=0.43$ ,  $p=0.51$ ) and verbal IQ ( $t=1.47$ ,  $df=118$ ,  $p=0.14$ ). However, the completer group was younger compared with the noncompleter group (age:  $t=3.24$ ,  $df=118$ ,  $p<0.01$ , completer: mean age=34.36,  $SD=9.35$ ; noncompleter: mean age=41.31,  $SD=13.37$ ).

FIGURE A. Subjects Flow Depicting Sample Sizes and Drop Out Reasons from the Initial Testing to the Analyzed Sample

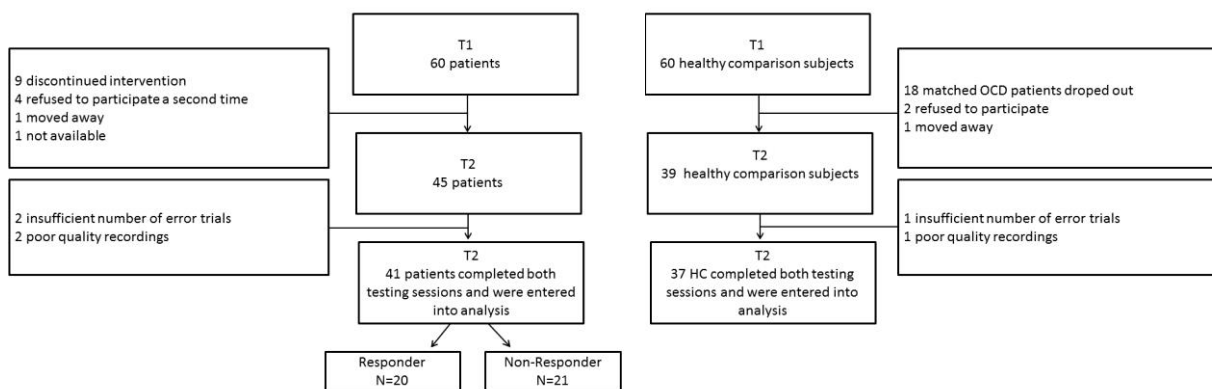

### **B. List of Medications of OCD Patients (Final Analysis Sample)**

TABLE A. List of Medications

| <b>Medication</b>          | <b>Number of Patients at T1</b> | <b>Number of Patients at T2</b> |
|----------------------------|---------------------------------|---------------------------------|
| Paroxetine                 | 5                               | 4                               |
| Citalopram                 | 4                               | 3                               |
| Escitalopram               | 3                               | 4                               |
| Fluoxetine                 | 3                               | 1                               |
| Venlafaxine and Citalopram | 1                               | 1                               |
| Trimipramine               | 1                               | 1                               |
| Clomipramine               | 4                               | 3                               |

### **C. Behavioral Data**

Behavioral data indicate that OCD patients committed fewer errors than healthy control participants ( $F=5.33$ ,  $df=1$ ,  $76$ ,  $p<0.05$ ). Numbers of errors did not differ between sessions ( $F=0.18$ ,  $df=1$ ,  $76$ ,  $p=0.67$ ), and there was no interaction between *session* and *group* ( $F=0.01$ ,  $df=1$ ,  $76$ ,  $p=0.92$ ). Response times did not significantly differ between groups ( $F=0.55$ ,  $df=1$ ,  $76$ ,  $p=0.46$ ). In accordance with other studies using flanker tasks (e.g. Carrasco et al., 2013; Endrass et al., 2014; Riesel et al. 2014; Weinberg et al. 2010), correct reaction times were slower compared with error reaction times ( $F=1120.15$ ,  $df=1$ ,  $76$ ,  $p<0.001$ ). There was no main effect of *session* ( $F=0.04$ ,  $df=1$ ,  $76$ ,  $p=0.85$ ). A significant interaction between *session* and *response type* ( $F=28.61$ ,  $df=1$ ,  $76$ ,  $p<0.001$ ) reflected a smaller difference between correct and incorrect reaction times in the second testing session (T1: mean=97, SD=26, T2: mean=82, SD=24). No interaction between *session*, *response type* and *group* was observed ( $F=0.72$ ,  $df=1,76$ ,  $p=0.40$ ).

### **D. Associations with Obsessive-Compulsive Symptoms and Scatterplots**

Table B presents correlations between performance monitoring and obsessive-compulsive symptoms at each of the two testing sessions as well as the changes in symptom-severity and performance monitoring between testing sessions. Figure B depicts scatterplots of the correlations. No significant association was observed for obsessive-compulsive symptoms and performance monitoring activity in both groups. In addition, the correlations between symptom reduction in obsessive-compulsive symptoms (i.e. T1 minus T2, separately for OCI-R and Y-BOCS scores) and changes in performance monitoring between testing sessions were not significant ( $p$  values  $>0.40$ ).

TABLE B. Pearson’s Coefficients for Correlations (r) between Obsessive-Compulsive Symptoms and Error-Related and Correct-Related Negativity Amplitudes at Fronto-Central Electrode (FCz), Separately for Obsessive-Compulsive Disorder (OCD) Patients and Healthy Comparison Subjects and each Testing Session.

| Measures                               | Healthy controls<br>(N=37) |     |                   |     | OCD Patients<br>(N=41) |     |                   |     |
|----------------------------------------|----------------------------|-----|-------------------|-----|------------------------|-----|-------------------|-----|
|                                        | Correct                    |     | Errors            |     | Correct                |     | Errors            |     |
|                                        | r                          | p   | r                 | p   | r                      | p   | r                 | p   |
| <b>T1</b>                              |                            |     |                   |     |                        |     |                   |     |
| Obsessive-Compulsive Inventory-Revised | -.03                       | .85 | -.07              | .67 | -.14                   | .40 | -.15              | .35 |
| Yale-Brown Obsessive Compulsive Scale  | -                          |     | -                 |     | -.03                   | .86 | .02               | .88 |
| <b>T2</b>                              |                            |     |                   |     |                        |     |                   |     |
| Obsessive-Compulsive Inventory-Revised | .16                        | .34 | -.14              | .43 | .06                    | .70 | -.06              | .70 |
| Yale-Brown Obsessive Compulsive Scale  | -                          |     | -                 |     | .13                    | .41 | .13               | .40 |
| Measures                               | Correct<br>(T1-T2)         |     | Errors<br>(T1-T2) |     | Correct<br>(T1-T2)     |     | Errors<br>(T1-T2) |     |
|                                        | r                          | p   | r                 | p   | r                      | p   | r                 | p   |
| <b>T1 minus T2</b>                     |                            |     |                   |     |                        |     |                   |     |
| Obsessive-Compulsive Inventory-Revised | -.10                       | .56 | .02               | .91 | -.01                   | .93 | .13               | .44 |
| Yale-Brown Obsessive Compulsive Scale  | -                          |     | -                 |     | -.09                   | .55 | -.07              | .66 |

FIGURE B. Scatterplots depicting the associations between Neural Correlates of Performance Monitoring and Symptom Severity for Healthy Comparison Subjects (left) and OCD Patients (right).<sup>a</sup>

A)

T1

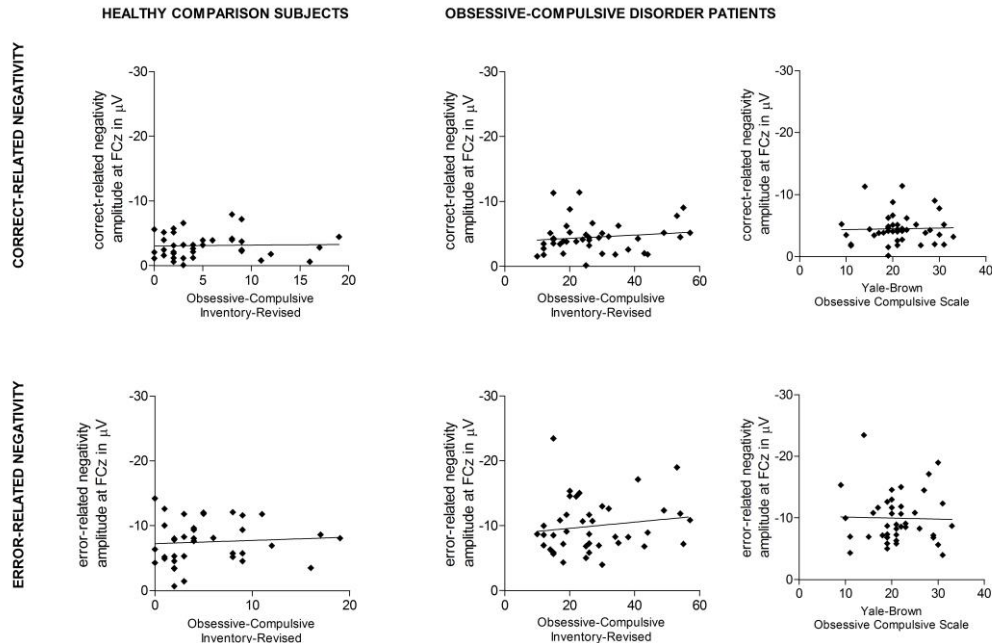

B)

T2

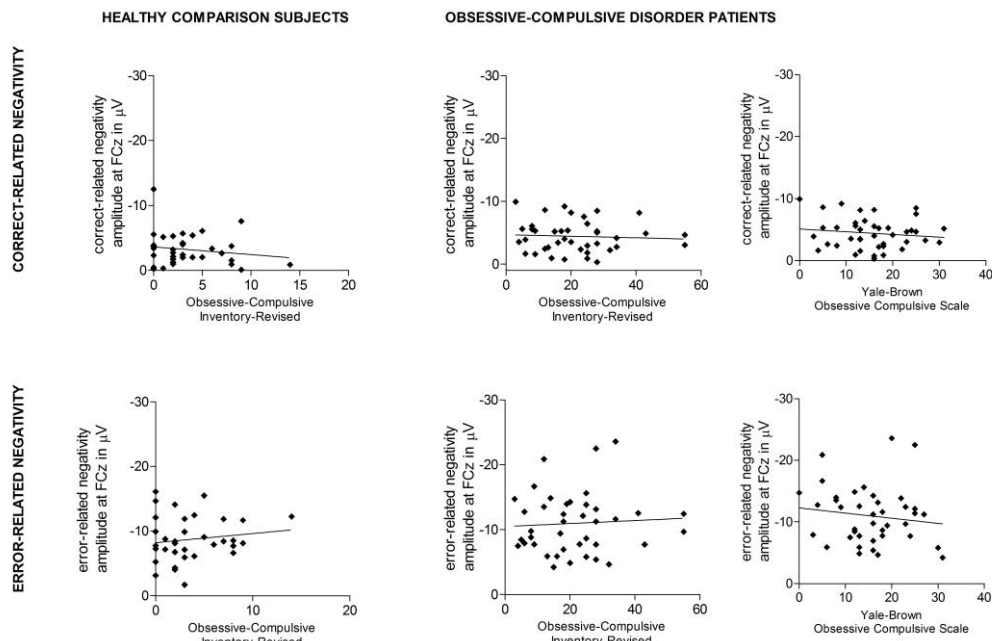

<sup>a</sup> The top images (panel A) depict scatterplots of the first test session (T1). The bottom images (panel B) depict scatterplots of the second test session (T2).

**E. Obsessive-Compulsive Disorder Symptom Dimensions**

Dimensional scores of OCD symptoms at T1 were derived from the Yale-Brown Obsessive-Compulsive checklist (Goodman et al., 1989) for each patient according to a method recently described by Katerberg et al. (2010). The five resulting dimensions are: taboo, contamination/cleaning, doubt, rituals/superstitious and hoarding/symmetry. Multiple regression analyses were performed for the OCD patient group analyzing the prediction of performance monitoring by symptom dimensional scores to explore the unique contributions of symptom dimensions. Table C and D summarize the regression model for error-related (Table C) and correct-related negativity (Table D) including the zero-order and partial correlations. The analysis revealed no significant association between symptom dimensions and performance monitoring. This suggests that overactive performance-monitoring represents a common neural correlate that is shared across all symptom dimensions in OCD.

TABLE C. Multivariate Regression Model and Correlations for the Error-Related Negativity at T1 as Dependent Variable and the Lifetime (Past and Present) Symptom Dimension Scores as Predictors.

|                        | Regression |       |        |         |       |     |     | Correlation            |                  |
|------------------------|------------|-------|--------|---------|-------|-----|-----|------------------------|------------------|
|                        | $R^2$      | B     | B (SE) | $\beta$ | $t$   | $p$ | $F$ | $R$<br>(zero<br>order) | $R$<br>(partial) |
| <b>Composite score</b> | .12        |       |        |         |       |     | .52 |                        |                  |
| Taboo                  |            | -2.08 | 5.09   | -.11    | -.41  | .68 |     | -.27                   | -.07             |
| Contamination/cleaning |            | -2.1  | 2.01   | -.18    | -1.05 | .30 |     | -.25                   | -.18             |
| Doubts                 |            | -.92  | 2.72   | -.06    | -.32  | .75 |     | -.21                   | -.06             |
| Superstitions/rituals  |            | -.48  | 3.15   | -.04    | -.17  | .86 |     | -.19                   | -.03             |
| Symmetry/hoarding      |            | -1.31 | 2.87   | -.1     | -.41  | .41 |     | -.27                   | -.06             |

Note: B (unstandardized coefficient), SE (standard error),  $\beta$  (standardized coefficient)

TABLE D. Multivariate Regression Model and Correlations for the Correct-Related Negativity at T1 as Dependent Variable and the Lifetime (Past and Present) Symptom Dimension Scores as Predictors.

|                        | Regression |       |        |         |       |     |     | Correlation            |                  |
|------------------------|------------|-------|--------|---------|-------|-----|-----|------------------------|------------------|
|                        | $R^2$      | B     | B (SE) | $\beta$ | $t$   | $p$ | $F$ | $R$<br>(zero<br>order) | $R$<br>(partial) |
| <b>Composite score</b> | .1         |       |        |         |       |     | .65 |                        |                  |
| Taboo                  |            | .25   | 3.38   | .02     | .08   | .94 |     | -.08                   | -.01             |
| Contamination/cleaning |            | -2.25 | 1.31   | -.31    | -1.72 | .1  |     | -.31                   | -.29             |
| Doubts                 |            | -.16  | 1.87   | -.02    | -.08  | .93 |     | -.08                   | -.02             |
| Superstitions/rituals  |            | -.47  | 1.78   | -.06    | -.27  | .79 |     | -.08                   | -.05             |
| Symmetry/hoarding      |            | .08   | 2.06   | .01     | -.04  | .97 |     | -.09                   | -.01             |

Note: B (unstandardized coefficient), SE (standard error),  $\beta$  (standardized coefficient)

**References Data Supplement**

- Carrasco M, Harbin SM, Nienhuis JK et al: Increased error-related brain activity in youth with obsessive-compulsive disorder and unaffected siblings. *Depress Anxiety* 2013; 30:39-46. Available at doi: 10.1002/da.22035
- Endrass T, Riesel A, Kathmann N et al: Performance monitoring in obsessive-compulsive disorder and social anxiety disorder – the role of depressive symptoms. *Journal of Abnormal Psychology* 2014; in press.
- Goodman WK, Price LH, Rasmussen SA et al: The Yale-Brown Obsessive Compulsive Scale. I. Development, use, and reliability. *Arch Gen Psychiatry* 1989; 46:1006-1011
- Katerberg H, Delucchi KL, Stewart SE et al: Symptom dimensions in OCD: item-level factor analysis and heritability estimates. *Behav Genet* 2010; 40:505-517. Available at doi: 10.1007/s10519-010-9339-z
- Riesel A, Kathmann N, Endrass T: Overactive performance monitoring in obsessive-compulsive disorder is independent of symptom expression. *Eur Arch Psychiatry Clin Neurosci* 2014; 264:707-717. Available at doi: 10.1007/s00406-014-0499-3
- Weinberg A, Olvet DM, Hajcak G: Increased error-related brain activity in generalized anxiety disorder. *Biological Psychology* 2010; 85:472-480. Available at doi: 10.1016/j.biopsycho.2010.09.011
